# Supplementary material for: The association of α4β7 expression with HIV acquisition and disease progression in people who inject drugs and men who have sex with men: Case control studies
Source: PubMed Central journal article supplement (PMC7658649; doi:10.1016/j.ebiom.2020.103102), 2020-11-07
Supplement: mmc1.pdf [file mmc1.pdf]

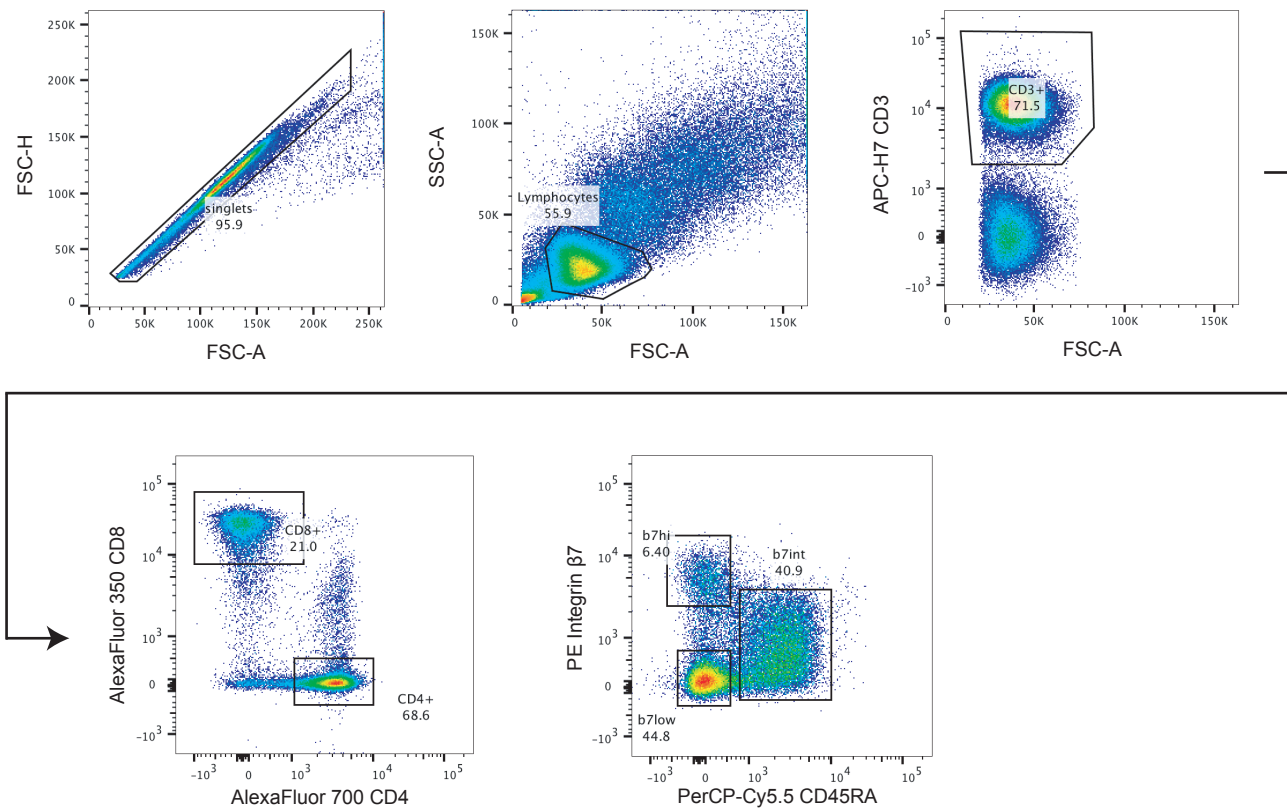

Supplementary Figure 1: Gating strategy used to determine CD4+ B7hi expression.
